# Supplementary material for: The Pollution Status of Heavy Metals in the Surface Seawater and Sediments of the Tianjin Coastal Area, North China
Source: MDPI journal article supplement (doi:10.3390/ijerph182111243), 2021-10-26
Supplement: s1 [file s1]

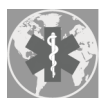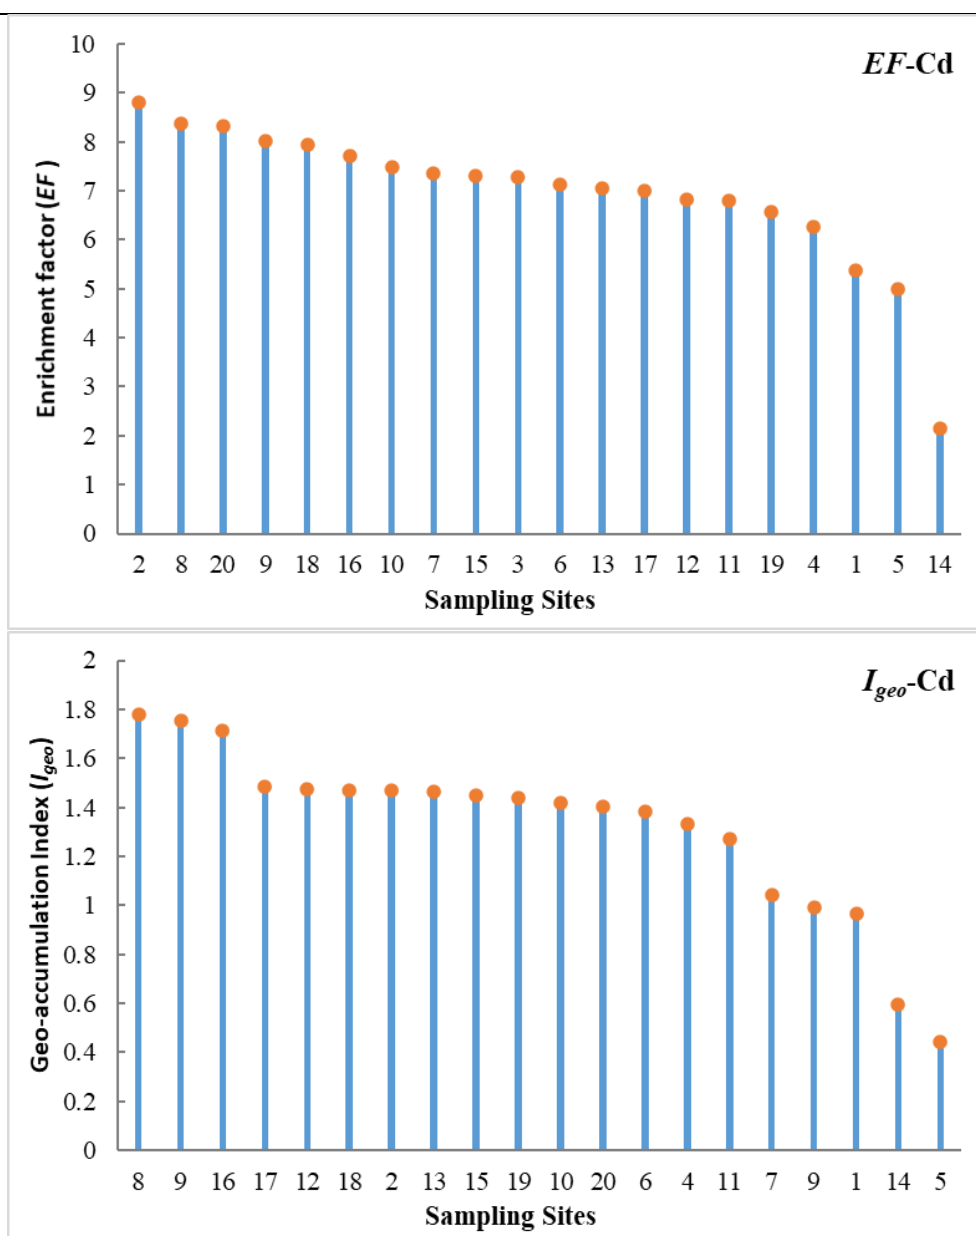

**Figure S1.** Spatial distributions of the Enrichment factor ( $EF$ ) and the Geo-accumulation Index ( $I_{geo}$ ) of Cd in sediments of the Tianjin coastal area.

**Table S1.** Sampling times and sampling sites of heavy metals from the Tianjin coastal area.

| Sampling sites | Sam-<br>pling<br>times | May, 2011     |               | Sep. 2011     |               | Sep. 2012     |               | Sep. 2015     |               |
|----------------|------------------------|---------------|---------------|---------------|---------------|---------------|---------------|---------------|---------------|
|                |                        | Sea-<br>water | Sedi-<br>ment | Sea-<br>water | Sedi-<br>ment | Sea-<br>water | Sedi-<br>ment | Sea-<br>water | Sedi-<br>ment |
| 1              |                        | √             | √             | √             | √             | √             | √             | ×             | √             |
| 2              |                        | √             | √             | √             | √             | √             | √             | ×             | √             |
| 3              |                        | √             | √             | √             | √             | √             | √             | ×             | √             |
| 4              |                        | √             | √             | √             | √             | √             | √             | ×             | √             |
| 5              |                        | √             | √             | √             | √             | √             | √             | ×             | √             |
| 6              |                        | √             | √             | √             | √             | √             | √             | ×             | √             |
| 7              |                        | √             | √             | √             | √             | √             | √             | ×             | √             |
| 8              |                        | √             | √             | √             | √             | √             | √             | ×             | √             |
| 9              |                        | √             | √             | √             | √             | √             | √             | ×             | √             |
| 10             |                        | √             | √             | √             | √             | √             | √             | ×             | √             |
| 11             |                        | √             | √             | √             | √             | √             | √             | ×             | √             |
| 12             |                        | √             | √             | √             | √             | √             | √             | ×             | √             |
| 13             |                        | √             | √             | √             | √             | √             | √             | ×             | √             |
| 14             |                        | √             | √             | √             | √             | √             | √             | ×             | √             |
| 15             |                        | √             | √             | √             | √             | √             | √             | ×             | √             |
| 16             |                        | √             | √             | √             | √             | √             | √             | ×             | √             |
| 17             |                        | √             | √             | √             | √             | √             | √             | ×             | √             |
| 18             |                        | √             | √             | √             | √             | √             | √             | ×             | √             |
| 19             |                        | √             | √             | √             | √             | √             | √             | ×             | √             |
| 20             |                        | √             | √             | √             | √             | √             | √             | ×             | √             |

**Table S2.** Enrichment factor (*EF*) of heavy metals in sediments.

| Sam-<br>pling<br>Year | Sta-<br>tions | <i>EF</i> (Enrichment Factor) |      |      |      |      |      |
|-----------------------|---------------|-------------------------------|------|------|------|------|------|
|                       |               | Cr                            | Cu   | Zn   | As   | Cd   | Pb   |
| May,<br>2011          | 1             | 0.80                          | 0.85 | 0.80 | 1.16 | 1.25 | 0.94 |
|                       | 2             | 0.78                          | 0.80 | 0.43 | 0.70 | 1.23 | 1.02 |
|                       | 3             | 0.83                          | 1.00 | 0.57 | 0.69 | 1.37 | 1.11 |
|                       | 4             | 0.80                          | 0.77 | 0.56 | 1.11 | 1.18 | 1.06 |
|                       | 5             | 0.83                          | 0.84 | 0.50 | 1.05 | 1.34 | 1.05 |
|                       | 6             | 0.78                          | 0.83 | 0.72 | 1.33 | 1.23 | 1.14 |
|                       | 7             | 0.86                          | 0.72 | 0.40 | 1.13 | 1.37 | 1.04 |
|                       | 8             | 0.74                          | 1.28 | 0.92 | 1.80 | 2.11 | 1.35 |
|                       | 9             | 0.72                          | 1.27 | 0.89 | 1.85 | 2.10 | 1.38 |
|                       | 10            | 0.81                          | 1.01 | 0.60 | 1.63 | 1.36 | 0.95 |
|                       | 11            | 0.81                          | 0.97 | 0.90 | 1.32 | 1.39 | 0.95 |
|                       | 12            | 0.83                          | 1.16 | 1.03 | 1.14 | 1.40 | 0.97 |
|                       | 13            | 0.94                          | 2.67 | 2.28 | 1.13 | 2.11 | 1.08 |
|                       | 14            | 0.79                          | 0.88 | 0.67 | 0.71 | 1.26 | 0.94 |
|                       | 15            | 0.86                          | 0.87 | 0.60 | 0.75 | 1.19 | 0.93 |
|                       | 16            | 0.76                          | 0.92 | 0.65 | 1.09 | 1.29 | 0.85 |
|                       | 17            | 0.78                          | 0.87 | 0.74 | 1.19 | 1.32 | 1.03 |
|                       | 18            | 0.82                          | 0.85 | 0.58 | 0.66 | 1.12 | 0.89 |
|                       | 19            | 0.84                          | 0.92 | 0.89 | 1.10 | 1.48 | 1.10 |

|  |           |    |      |      |      |      |       |      |
|--|-----------|----|------|------|------|------|-------|------|
|  |           | 20 | 0.88 | 0.98 | 1.11 | 1.33 | 1.60  | 1.08 |
|  |           | 1  | 1.17 | 1.06 | 1.14 | 0.33 | 3.60  | 2.59 |
|  |           | 2  | 1.11 | 1.31 | 1.29 | 2.84 | 4.70  | 2.35 |
|  |           | 3  | 1.10 | 0.88 | 0.91 | 0.32 | 2.95  | 2.01 |
|  |           | 4  | 1.00 | 0.90 | 0.39 | 5.73 | 3.60  | 2.19 |
|  |           | 5  | 1.26 | 1.22 | 1.24 | 2.08 | 2.86  | 2.18 |
|  |           | 6  | 1.07 | 0.96 | 0.65 | 2.93 | 3.43  | 2.08 |
|  |           | 7  | 1.17 | 0.96 | 0.96 | 1.95 | 2.79  | 2.12 |
|  |           | 8  | 0.84 | 0.63 | 0.73 | 2.29 | 4.58  | 2.23 |
|  |           | 9  | 1.14 | 1.18 | 1.13 | 2.20 | 4.66  | 2.25 |
|  | Sep. 2011 | 10 | 1.11 | 0.79 | 0.74 | 2.96 | 2.96  | 1.98 |
|  |           | 11 | 1.13 | 0.81 | 0.92 | 3.06 | 2.64  | 2.55 |
|  |           | 12 | 1.09 | 0.97 | 0.89 | 1.84 | 3.31  | 2.07 |
|  |           | 13 | 1.08 | 0.91 | 2.23 | 0.61 | 2.98  | 2.00 |
|  |           | 14 | 1.07 | 0.98 | 0.97 | 0.51 | 3.03  | 2.18 |
|  |           | 15 | 1.10 | 1.02 | 1.05 | 0.45 | 3.82  | 2.69 |
|  |           | 16 | 1.09 | 0.99 | 1.26 | 3.04 | 3.97  | 2.68 |
|  |           | 17 | 1.08 | 0.96 | 0.79 | 2.72 | 3.25  | 2.29 |
|  |           | 18 | 1.09 | 0.89 | 0.75 | 3.16 | 3.39  | 2.40 |
|  |           | 19 | 1.16 | 1.13 | 1.03 | 1.68 | 3.42  | 2.71 |
|  |           | 20 | 1.09 | 1.01 | 1.04 | 2.10 | 3.05  | 2.43 |
|  |           | 1  | 0.39 | 0.38 | 0.80 | 0.33 | 11.25 | 1.65 |
|  |           | 2  | 0.35 | 0.26 | 0.28 | 0.26 | 20.52 | 0.79 |
|  |           | 3  | 0.37 | 0.34 | 0.30 | 0.22 | 17.48 | 0.89 |
|  |           | 4  | 0.35 | 0.28 | 0.27 | 0.26 | 14.03 | 0.96 |
|  |           | 5  | 0.36 | 0.30 | 0.56 | 0.27 | 10.75 | 0.89 |
|  |           | 6  | 0.35 | 0.30 | 0.31 | 0.51 | 16.72 | 0.91 |
|  |           | 7  | 0.36 | 0.30 | 0.54 | 0.45 | 17.90 | 1.14 |
|  |           | 8  | 0.37 | 0.50 | 0.42 | 0.49 | 18.46 | 1.24 |
|  |           | 9  | 0.39 | 0.50 | 0.48 | 0.30 | 17.33 | 0.94 |
|  | Sep. 2015 | 10 | 0.37 | 0.33 | 0.29 | 0.56 | 18.15 | 0.97 |
|  |           | 11 | 0.36 | 0.34 | 0.25 | 0.41 | 16.38 | 1.03 |
|  |           | 12 | 0.35 | 0.30 | 0.27 | 0.45 | 15.72 | 0.89 |
|  |           | 13 | 0.34 | 0.27 | 0.22 | 0.26 | 16.05 | 0.74 |
|  |           | 14 | 0.34 | 0.31 | 0.17 | 6.00 | —     | 2.12 |
|  |           | 15 | 0.35 | 0.27 | 0.25 | 0.50 | 16.89 | 0.81 |
|  |           | 16 | 0.36 | 0.32 | 0.24 | 0.29 | 17.84 | 1.09 |
|  |           | 17 | 0.35 | 0.29 | 0.26 | 0.57 | 16.40 | 0.77 |
|  |           | 18 | 0.38 | 0.30 | 0.30 | 0.47 | 19.31 | 1.03 |
|  |           | 19 | 0.36 | 0.31 | 0.27 | 0.27 | 14.78 | 1.01 |
|  |           | 20 | 0.36 | 0.30 | 0.26 | 0.48 | 20.29 | 0.82 |

Table S3. Geo-accumulation index ( $I_{geo}$ ), ecological risk coefficient ( $E_i$ ) and RI of heavy metals in sediments.

| Sam-<br>pling<br>Year | Sta-<br>tions | $I_{geo}$ (Geo-Accumulation Index) |       |       |       |       |       | $E_i$ (Ecological Risk Coefficient) |      |      |       |       |      | RI    |
|-----------------------|---------------|------------------------------------|-------|-------|-------|-------|-------|-------------------------------------|------|------|-------|-------|------|-------|
|                       |               | Cr                                 | Cu    | Zn    | As    | Cd    | Pb    | Cr                                  | Cu   | Zn   | As    | Cd    | Pb   |       |
| May,<br>2011          | 1             | -0.47                              | -0.39 | -0.47 | 0.06  | 0.17  | -0.24 | 2.16                                | 5.74 | 1.08 | 15.65 | 50.74 | 6.36 | 81.73 |
|                       | 2             | -0.75                              | -0.72 | -1.62 | -0.91 | -0.10 | -0.37 | 1.78                                | 4.56 | 0.49 | 7.98  | 41.91 | 5.79 | 62.52 |

|              |    |       |       |       |       |       |       |      |       |      |       |        |      |        |
|--------------|----|-------|-------|-------|-------|-------|-------|------|-------|------|-------|--------|------|--------|
|              | 3  | -0.61 | -0.35 | -1.15 | -0.88 | 0.11  | -0.19 | 1.96 | 5.87  | 0.67 | 8.13  | 48.53  | 6.57 | 71.73  |
|              | 4  | -0.69 | -0.75 | -1.20 | -0.22 | -0.13 | -0.29 | 1.86 | 4.47  | 0.65 | 12.84 | 41.17  | 6.13 | 67.12  |
|              | 5  | -0.76 | -0.74 | -1.50 | -0.42 | -0.07 | -0.42 | 1.77 | 4.48  | 0.53 | 11.21 | 42.97  | 5.59 | 66.55  |
|              | 6  | -0.75 | -0.66 | -0.86 | 0.01  | -0.10 | -0.22 | 1.78 | 4.74  | 0.82 | 15.12 | 41.91  | 6.46 | 70.83  |
|              | 7  | -0.86 | -1.10 | -1.95 | -0.46 | -0.18 | -0.58 | 1.66 | 3.49  | 0.39 | 10.91 | 39.71  | 5.03 | 61.17  |
|              | 8  | -0.77 | 0.02  | -0.46 | 0.51  | 0.74  | 0.09  | 1.75 | 7.61  | 1.09 | 21.34 | 75.22  | 8.00 | 115.02 |
|              | 9  | -0.85 | -0.03 | -0.55 | 0.51  | 0.69  | 0.09  | 1.66 | 7.33  | 1.03 | 21.35 | 72.79  | 7.97 | 112.13 |
|              | 10 | -0.24 | 0.08  | -0.69 | 0.76  | 0.51  | -0.01 | 2.54 | 7.93  | 0.93 | 25.48 | 63.97  | 7.44 | 108.29 |
|              | 11 | -0.23 | 0.03  | -0.07 | 0.48  | 0.56  | 0.00  | 2.56 | 7.67  | 1.43 | 20.86 | 66.18  | 7.52 | 106.22 |
|              | 12 | -0.36 | 0.13  | -0.04 | 0.10  | 0.40  | -0.13 | 2.33 | 8.21  | 1.46 | 16.08 | 59.43  | 6.86 | 94.37  |
|              | 13 | -0.56 | 0.95  | 0.72  | -0.30 | 0.60  | -0.36 | 2.03 | 14.46 | 2.47 | 12.20 | 68.38  | 5.83 | 105.37 |
|              | 14 | -0.44 | -0.28 | -0.67 | -0.60 | 0.23  | -0.18 | 2.22 | 6.18  | 0.94 | 9.89  | 52.94  | 6.61 | 78.78  |
|              | 15 | -0.23 | -0.21 | -0.76 | -0.42 | 0.23  | -0.12 | 2.56 | 6.49  | 0.89 | 11.19 | 52.94  | 6.89 | 80.96  |
|              | 16 | -0.26 | 0.02  | -0.47 | 0.27  | 0.51  | -0.08 | 2.51 | 7.59  | 1.08 | 18.14 | 63.97  | 7.08 | 100.38 |
|              | 17 | -0.52 | -0.36 | -0.60 | 0.08  | 0.23  | -0.12 | 2.09 | 5.84  | 0.99 | 15.90 | 52.94  | 6.89 | 84.65  |
|              | 18 | -0.22 | -0.17 | -0.72 | -0.53 | 0.23  | -0.11 | 2.57 | 6.67  | 0.91 | 10.38 | 52.94  | 6.97 | 80.43  |
|              | 19 | -0.36 | -0.22 | -0.27 | 0.03  | 0.46  | 0.03  | 2.34 | 6.44  | 1.25 | 15.34 | 61.76  | 7.65 | 94.78  |
|              | 20 | -0.26 | -0.09 | 0.08  | 0.34  | 0.60  | 0.04  | 2.51 | 7.03  | 1.58 | 18.93 | 68.38  | 7.71 | 106.14 |
| Sep.<br>2011 | 1  | -1.06 | -1.21 | -1.10 | -2.90 | 0.56  | 0.09  | 1.44 | 3.25  | 0.70 | 2.01  | 66.24  | 7.96 | 81.60  |
|              | 2  | -1.11 | -0.87 | -0.90 | 0.24  | 0.97  | -0.03 | 1.39 | 4.10  | 0.80 | 17.76 | 87.97  | 7.32 | 119.35 |
|              | 3  | -1.19 | -1.51 | -1.46 | -2.97 | 0.23  | -0.32 | 1.31 | 2.64  | 0.54 | 1.91  | 52.94  | 5.99 | 65.34  |
|              | 4  | -1.27 | -1.43 | -2.63 | 1.25  | 0.58  | -0.14 | 1.24 | 2.79  | 0.24 | 35.66 | 67.14  | 6.82 | 113.89 |
|              | 5  | -1.12 | -1.18 | -1.15 | -0.40 | 0.06  | -0.33 | 1.38 | 3.32  | 0.68 | 11.37 | 46.84  | 5.95 | 69.53  |
|              | 6  | -1.17 | -1.32 | -1.88 | 0.29  | 0.51  | -0.20 | 1.33 | 3.00  | 0.41 | 18.34 | 64.29  | 6.51 | 93.88  |
|              | 7  | -1.29 | -1.58 | -1.57 | -0.55 | -0.04 | -0.43 | 1.22 | 2.50  | 0.50 | 10.22 | 43.90  | 5.56 | 63.91  |
|              | 8  | -1.55 | -1.97 | -1.76 | -0.11 | 0.89  | -0.15 | 1.03 | 1.91  | 0.44 | 13.90 | 83.50  | 6.77 | 107.55 |
|              | 9  | -1.10 | -1.05 | -1.11 | -0.16 | 0.93  | -0.12 | 1.40 | 3.61  | 0.70 | 13.47 | 85.60  | 6.90 | 111.68 |
|              | 10 | -1.52 | -2.01 | -2.09 | -0.10 | -0.10 | -0.68 | 1.05 | 1.86  | 0.35 | 14.00 | 41.95  | 4.68 | 63.90  |
|              | 11 | -1.58 | -2.05 | -1.87 | -0.14 | -0.35 | -0.40 | 1.01 | 1.82  | 0.41 | 13.65 | 35.36  | 5.70 | 57.94  |
|              | 12 | -1.04 | -1.21 | -1.34 | -0.29 | 0.56  | -0.12 | 1.45 | 3.24  | 0.59 | 12.23 | 66.14  | 6.91 | 90.57  |
|              | 13 | -1.18 | -1.42 | -0.13 | -2.01 | 0.29  | -0.29 | 1.33 | 2.80  | 1.37 | 3.72  | 54.93  | 6.15 | 70.30  |
|              | 14 | -1.00 | -1.13 | -1.14 | -2.07 | 0.50  | 0.03  | 1.50 | 3.43  | 0.68 | 3.56  | 63.84  | 7.65 | 80.68  |
|              | 15 | -1.10 | -1.21 | -1.18 | -2.39 | 0.69  | 0.18  | 1.40 | 3.23  | 0.66 | 2.87  | 72.65  | 8.52 | 89.34  |
|              | 16 | -1.00 | -1.14 | -0.80 | 0.48  | 0.86  | 0.29  | 1.50 | 3.41  | 0.86 | 20.86 | 81.78  | 9.19 | 117.60 |
|              | 17 | -0.99 | -1.15 | -1.43 | 0.35  | 0.61  | 0.10  | 1.51 | 3.37  | 0.56 | 19.08 | 68.45  | 8.04 | 101.00 |
|              | 18 | -1.04 | -1.33 | -1.57 | 0.50  | 0.60  | 0.10  | 1.46 | 2.99  | 0.51 | 21.16 | 68.04  | 8.04 | 102.20 |
|              | 19 | -1.04 | -1.08 | -1.21 | -0.51 | 0.51  | 0.18  | 1.46 | 3.54  | 0.65 | 10.51 | 64.23  | 8.48 | 88.86  |
|              | 20 | -1.03 | -1.15 | -1.11 | -0.09 | 0.45  | 0.12  | 1.47 | 3.38  | 0.70 | 14.09 | 61.58  | 8.17 | 89.39  |
| Sep.<br>2012 | 1  | -0.56 | -0.52 | -0.26 | -0.17 | 1.69  | -0.19 | 2.04 | 5.23  | 1.25 | 13.29 | 144.90 | 6.57 | 173.28 |
|              | 2  | -0.54 | -0.56 | -0.32 | -0.12 | 1.53  | -0.22 | 2.07 | 5.10  | 1.20 | 13.85 | 130.15 | 6.46 | 158.83 |
|              | 3  | -0.50 | -0.25 | -0.22 | -0.49 | 0.17  | -0.17 | 2.11 | 6.31  | 1.29 | 10.68 | 50.74  | 6.68 | 77.81  |
|              | 4  | -0.50 | -0.45 | -0.22 | -0.06 | 1.54  | -0.20 | 2.13 | 5.50  | 1.29 | 14.40 | 130.45 | 6.53 | 160.29 |
|              | 5  | -0.66 | -0.49 | -0.59 | -0.16 | 1.17  | -0.36 | 1.90 | 5.33  | 1.00 | 13.41 | 101.47 | 5.85 | 128.97 |
|              | 6  | -0.45 | -0.33 | -0.10 | 0.00  | 1.57  | -0.18 | 2.20 | 5.95  | 1.40 | 15.02 | 133.46 | 6.62 | 164.65 |
|              | 7  | -0.58 | -0.42 | -0.59 | -0.28 | 1.12  | -0.24 | 2.01 | 5.61  | 1.00 | 12.36 | 98.07  | 6.37 | 125.41 |
|              | 8  | -0.63 | -0.67 | -0.36 | -0.55 | 1.92  | -0.21 | 1.94 | 4.70  | 1.17 | 10.27 | 170.51 | 6.48 | 195.07 |
|              | 9  | -0.60 | -0.60 | -0.30 | -0.47 | 1.87  | -0.19 | 1.98 | 4.93  | 1.22 | 10.86 | 164.93 | 6.60 | 190.52 |

|              |    |       |       |       |       |      |       |      |      |      |       |        |      |        |
|--------------|----|-------|-------|-------|-------|------|-------|------|------|------|-------|--------|------|--------|
|              | 10 | -0.54 | -0.50 | -0.19 | -0.34 | 1.78 | -0.15 | 2.06 | 5.31 | 1.31 | 11.87 | 154.28 | 6.75 | 181.58 |
|              | 11 | -0.49 | -0.40 | -0.08 | -0.15 | 1.71 | -0.13 | 2.13 | 5.70 | 1.41 | 13.55 | 147.33 | 6.86 | 176.98 |
|              | 12 | -0.45 | -0.32 | -0.01 | 0.02  | 1.68 | -0.13 | 2.20 | 6.03 | 1.49 | 15.26 | 144.00 | 6.87 | 175.85 |
|              | 13 | -0.39 | -0.23 | -0.01 | 0.09  | 1.56 | -0.17 | 2.29 | 6.40 | 1.49 | 16.00 | 132.35 | 6.66 | 165.20 |
|              | 14 | -0.45 | -0.26 | -0.57 | -0.47 | 1.04 | -0.04 | 2.20 | 6.27 | 1.01 | 10.82 | 92.65  | 7.28 | 120.22 |
|              | 15 | -0.50 | -0.36 | -0.06 | -0.42 | 1.46 | -0.09 | 2.12 | 5.84 | 1.43 | 11.17 | 123.53 | 7.06 | 151.16 |
|              | 16 | -0.43 | -0.22 | 0.24  | 0.33  | 1.86 | 0.01  | 2.22 | 6.46 | 1.78 | 18.84 | 163.24 | 7.57 | 200.11 |
|              | 17 | -0.51 | -0.42 | -0.52 | -0.13 | 1.48 | -0.09 | 2.11 | 5.61 | 1.05 | 13.71 | 125.74 | 7.03 | 155.24 |
|              | 18 | -0.38 | -0.31 | 0.10  | -0.11 | 1.72 | -0.05 | 2.30 | 6.05 | 1.60 | 13.86 | 147.79 | 7.23 | 178.84 |
|              | 19 | -0.46 | -0.29 | 0.14  | 0.04  | 1.58 | -0.09 | 2.18 | 6.14 | 1.65 | 15.37 | 134.43 | 7.06 | 166.83 |
|              | 20 | -0.46 | -0.50 | 0.01  | -0.34 | 0.86 | -0.28 | 2.19 | 5.29 | 1.51 | 11.89 | 81.62  | 6.17 | 108.66 |
| Sep.<br>2015 | 1  | -3.41 | -3.45 | -2.37 | -3.65 | 1.44 | -1.32 | 0.28 | 0.69 | 0.29 | 1.19  | 122.43 | 3.00 | 127.88 |
|              | 2  | -2.40 | -2.83 | -2.73 | -2.85 | 3.47 | -1.22 | 0.57 | 1.05 | 0.23 | 2.08  | 499.41 | 3.22 | 506.56 |
|              | 3  | -2.11 | -2.22 | -2.40 | -2.84 | 3.46 | -0.84 | 0.70 | 1.61 | 0.28 | 2.09  | 494.42 | 4.19 | 503.30 |
|              | 4  | -1.98 | -2.31 | -2.36 | -2.39 | 3.34 | -0.52 | 0.76 | 1.51 | 0.29 | 2.87  | 456.02 | 5.22 | 466.68 |
|              | 5  | -4.28 | -4.54 | -3.65 | -4.69 | 0.61 | -2.98 | 0.15 | 0.32 | 0.12 | 0.58  | 68.48  | 0.95 | 70.61  |
|              | 6  | -2.04 | -2.25 | -2.20 | -1.47 | 3.56 | -0.63 | 0.73 | 1.57 | 0.33 | 5.42  | 530.15 | 4.83 | 543.04 |
|              | 7  | -2.36 | -2.61 | -1.78 | -2.05 | 3.27 | -0.71 | 0.58 | 1.23 | 0.44 | 3.62  | 432.98 | 4.58 | 443.43 |
|              | 8  | -2.06 | -1.64 | -1.89 | -1.68 | 3.57 | -0.33 | 0.72 | 2.40 | 0.41 | 4.68  | 534.31 | 5.97 | 548.49 |
|              | 9  | -1.97 | -1.58 | -1.66 | -2.33 | 3.52 | -0.68 | 0.77 | 2.50 | 0.48 | 2.99  | 516.06 | 4.68 | 527.47 |
|              | 10 | -2.13 | -2.31 | -2.50 | -1.54 | 3.48 | -0.74 | 0.69 | 1.52 | 0.27 | 5.18  | 501.96 | 4.49 | 514.10 |
|              | 11 | -2.34 | -2.42 | -2.90 | -2.15 | 3.16 | -0.83 | 0.59 | 1.40 | 0.20 | 3.37  | 402.78 | 4.21 | 412.56 |
|              | 12 | -2.24 | -2.45 | -2.58 | -1.85 | 3.27 | -0.88 | 0.64 | 1.37 | 0.25 | 4.17  | 432.64 | 4.06 | 443.13 |
|              | 13 | -2.15 | -2.49 | -2.79 | -2.54 | 3.41 | -1.04 | 0.68 | 1.33 | 0.22 | 2.58  | 477.94 | 3.66 | 486.41 |
|              | 14 | -3.24 | -3.38 | -4.25 | 0.89  | —    | -0.62 | 0.32 | 0.72 | 0.08 | 27.75 | —      | 4.90 | 33.76  |
|              | 15 | -2.19 | -2.56 | -2.68 | -1.67 | 3.41 | -0.98 | 0.66 | 1.27 | 0.23 | 4.71  | 478.74 | 3.81 | 489.42 |
|              | 16 | -2.02 | -2.19 | -2.58 | -2.32 | 3.62 | -0.41 | 0.74 | 1.64 | 0.25 | 3.01  | 555.15 | 5.65 | 566.44 |
|              | 17 | -1.93 | -2.23 | -2.35 | -1.22 | 3.62 | -0.80 | 0.79 | 1.60 | 0.29 | 6.43  | 551.47 | 4.31 | 564.90 |
|              | 18 | -2.32 | -2.65 | -2.67 | -2.02 | 3.34 | -0.89 | 0.60 | 1.20 | 0.24 | 3.70  | 455.59 | 4.06 | 465.39 |
|              | 19 | -2.15 | -2.40 | -2.56 | -2.58 | 3.20 | -0.67 | 0.68 | 1.42 | 0.25 | 2.51  | 412.33 | 4.71 | 421.90 |
|              | 20 | -2.15 | -2.41 | -2.59 | -1.72 | 3.69 | -0.94 | 0.68 | 1.42 | 0.25 | 4.55  | 579.96 | 3.90 | 590.76 |
